# Supplementary material for: Alpha-mangostin inhibits the migration and invasion of A549 lung cancer cells
Source: PeerJ. 2018 Jun 25;6:e5027. doi: 10.7717/peerj.5027 (PMC6022730; doi:10.7717/peerj.5027)
Supplement: Data S1 [file peerj-06-5027-s002.xlsx]

## Sheet: Fig.1A
Fig.1A Cytotoxicity effects of a-mangostin on A549 and CCD-14Br cells in short term period (24 h culture).
	Ratio of cell viability, Vc
	A549				CCD-14Br
	a-mangostin (uM)	average	stdev		a-mangostin (uM)	average	stdev
	0	1	0.238794		0	1	0.354839
	2	0.904433	0.279291		2	1.34872	0.378822
	5	1.05554	0.214404		5	1.35388	0.413517
	10	0.910002	0.195856		10	1.383	0.351526
	15	0.642868	0.140229		15	0.775919	0.202807
	20	0.386686	0.175153		20	0.76348	0.202652
	25	0.334336	0.082115		25	0.481783	0.128641
	30	0.276416	0.0577162		30	0.327054	0.119231
	35	0.178028	0.0527359		35	0.180365	0.0567282
	50	0.0861365	0.0184519		50	0.0535483	0.0181245
	100	0.0542066	0.0119834		100	0.015928	0.00966343

## Sheet: Fig.1B
Fig.1B Cytotoxicity effects of a-mangostin on A549 cells in time course experiments (24-96 h culture).
		Abs 450 nm
		Average					STDEV
	a-mangostin (uM)	24 h	48 h	72 h	96 h		24 h	48 h	72 h	96 h
	0	0.26	0.833	1.902	2.73933		0.0313422	0.147503	0.389193	0.228347
	1	0.224333	0.661333	1.43467	2.477		0.0142244	0.0645833	0.20288	0.232539
	2	0.329667	0.502667	1.71333	2.113		0.0400541	0.154546	0.753591	0.416918
	5	0.327333	0.747667	1.914	2.02433		0.0935753	0.254034	0.324643	0.151513
	10	0.326667	0.333667	1.087	1.29367		0.080637	0.0642365	0.296263	0.296905
	15	0.196667	0.110333	0.272	0.135667		0.0185562	0.0181475	0.0237557	0.0195021
	20	0.192667	0.0966667	0.0983333	0.058		0.0581292	0.0202073	0.0211266	0.00873689
	25	0.138	0.0683333	0.059	0.053		0.0354448	0.0116762	0.00781025	0.0104403
	30	0.128333	0.0593333	0.0523333	0.041		0.0101489	0.0052915	0.00208167	0.001

## Sheet: Fig.1C
Fig.1C Cytotoxicity effects of a-mangostin on CCD-14Br cells in time course experiments (24-96 h culture).
		Abs 450 nm
		Average					STDEV
	a-mangostin (uM)	24 h	48 h	72 h	96 h		24 h	48 h	72 h	96 h
	0	0.286	0.522333	0.491667	0.674667		0.072856	0.123467	0.0500133	0.252014
	1	0.340333	0.558	0.488667	0.833333		0.0572975	0.102725	0.0756329	0.0858604
	2	0.339667	0.549333	0.668667	0.866667		0.0620833	0.225713	0.226502	0.0505206
	5	0.434667	0.503333	0.637667	0.899		0.0663652	0.121327	0.147276	0.167285
	10	0.465333	0.507333	0.541667	0.698667		0.114422	0.070316	0.100504	0.2603
	15	0.468	0.435	0.378	0.486667		0.0424382	0.0486861	0.0968624	0.0711899
	20	0.313	0.350667	0.334333	0.354		0.10499	0.0200083	0.0283608	0.0118462
	25	0.274	0.225667	0.157	0.163667		0.00907377	0.0122882	0.0205994	0.0159478
	30	0.185667	0.145	0.09	0.0783333		0.0435469	0.0310966	0.020664	0.0130128

## Sheet: Fig.2
Fig. 2 Young's modulus of A549 and CCD-14Br cells treated with a-mangostin.
	Young's modulus value of each cell (LogE (Pa))
	A549			CCD-14Br
	ctrl	5 uM	10 uM	ctrl	5 uM	10 uM
	3.6799	3.0528	1.949	3.945	3.8099	3.4852
	3.6325	2.9237	1.8811	4.0522	3.8099	3.2272
	3.8192	3.0406	1.9631	4.3208	3.6283	3.5531
	3.7588	2.8873	2.5344	4.0089	3.7404	3.6385
	3.6305	2.9497	2.532	3.1646	3.7765	3.5319
	3.7255	3.0693	1.9291	3.7825	3.6558	3.4584
	3.7809	3.2805	1.9278	4.0589	3.5111	3.5064
	3.6017	3.2767	1.8723	3.9157	3.5694	3.4354
	3.6347	2.8902	2.1117	4.1283	3.6709	3.3111
	3.5646	2.7907	2.1436	3.7122	3.8078	3.4867
	3.3716	3.3336	2.0898	3.9747	3.7819	3.4377
	3.618	3.2052	2.4594	4.156	3.4975	3.2072
	3.5376	2.8223	2.3838	4.0768	3.6267	3.198
	3.4688	2.8757	2.2827	4.076	3.5029	3.7268
	3.4481	2.7829	2.5503	4.1261	3.6082	3.4924
	3.4042	2.8751	2.1355	3.9067	3.5611	3.7604
	3.4263	3.3654	2.4622	3.9511	3.6383	3.6625
	3.543	3.0513	2.6106	4.2013	3.5451	3.0603
	3.6658	3.197	1.9749	3.8761	3.4791	3.6324
	3.5902	3.0204	2.4539	3.6804	3.439	3.6723
	3.2411	3.2928	2.4953	3.8087	3.7549	3.3751
	3.3781	3.2066	2.552	3.8837	4.1268	3.2724
	3.3729	3.1665	2.44	3.992	3.4551	3.4685
	3.6306	3.0421	2.5127	4.2272	3.5332	3.4893
	3.5118	3.2771	2.7327	3.9371	3.5223	3.5063
		2.892	2.5409	3.8395	3.5223	3.2729
		3.0818	2.6505	3.8005		3.2118
		3.0237	2.3642			3.3987
		2.9813	2.4439
			2.4123

## Sheet: Fig.3B
Fig. 3 Effect of a-mangostin on migration of A549 cells.
	Ratio of cell covered area, Ac
	ctrl					5 uM of a-mangostin					10 uM of a-mangostin
	Position	0h	12h	24h		Position	0h	12h	24h		Position	0h	12h	24h
	1	0	0.351783	0.888122		1	0	0.221863	0.83442		1	0	0.204448	0.652382
	2	0	0.518499	0.990715		2	0	0.301804	0.839559		2	0	0.447953	0.855739
	3	0	0.59844	1		3	0	0.36773	0.938121		3	0	0.471425	1
	4	0	0.457976	0.947717		4	0	0.53265	1		4	0	0.268626	0.805071
	5	0	0.547297	1		5	0	0.336452	0.917583		5	0	0.402547	1
	6	0	0.47543	1		6	0	0.465253	1		6	0	0.349731	0.921345
	7	0	0.460811	1		7	0	0.398022	0.855634		7	0	0.389583	0.927961
	8	0	0.423729	0.975934		8	0	0.506297	0.948625		8	0	0.268602	0.907549
	9	0	0.415005	1		9	0	0.24908	0.689221		9	0	0.340464	0.828326
	10	0	0.411745	1		10	0	0.24438	0.672713		10	0	0.389403	0.822425
	average	0	0.466072	0.980249		11	0	0.400801	0.942194		average	0	0.353278	0.87208
	stdev	0	0.0726197	0.036537		average	0	0.365848	0.876188		stdev	0	0.0847452	0.103783
						stdev	0	0.106666	0.112107

## Sheet: Fig.4B
Fig. 4 Invasion of cancer A549 to CCD-14Br cells in co-culture conditions treated with a-mangostin.
	Ratio of cell area, Ac, in mono-culture										Ratio of cell area, Ac, in co-culture
	A549					CCD14-Br					A549					CCD14-Br
	average	ctrl	5 uM	10 uM		average	ctrl	5 uM	10 uM		average	ctrl	5 uM	10 uM		average	ctrl	5 uM	10 uM
	0	0.112252	0.0869461	0.0888819		0	0.0563703	0.0521348	0.0561944		0	0.0858576	0.0787834	0.115463		0	0.0358608	0.0361856	0.0582216
	1	0.169974	0.1241	0.117151		1	0.0648308	0.0697775	0.0799255		1	0.0921239	0.0977525	0.126343		1	0.0341631	0.0369163	0.0553373
	2	0.225294	0.236168	0.130129		2	0.12018	0.104383	0.108989		2	0.154451	0.180023	0.197235		2	0.0409973	0.0621076	0.0910941
	3	0.377223	0.277377	0.126134		3	0.133606	0.1437	0.126861		3	0.186803	0.186976	0.188631		3	0.0500063	0.0784715	0.0897319
	4	0.514892	0.370309	0.0666902		4	0.174434	0.195755	0.174082		4	0.285486	0.245529	0.243789		4	0.0724941	0.0881434	0.122442
	5	0.5752	0.449723	0.0577074		5	0.212346	0.234006	0.233668		5	0.473861	0.314163	0.281406		5	0.0695467	0.096268	0.110017
	6	0.605393	0.48917	0.0363137		6	0.229517	0.262415	0.2196		6	0.752444	0.502193	0.336175		6	0.0527773	0.0924392	0.119634
	stdev	ctrl	5 uM	10 uM		stdev	ctrl	5 uM	10 uM		stdev	ctrl	5 uM	10 uM		stdev	ctrl	5 uM	10 uM
	0	0.0371691	0.0403323	0.0317673		0	0.0110878	0.0160497	0.0228366		0	0.0377136	0.0223295	0.0397406		0	0.00902231	0.00982468	0.0185976
	1	0.0644155	0.060895	0.0457517		1	0.0130941	0.0213025	0.0323974		1	0.0434551	0.0261242	0.0423189		1	0.00719465	0.00847428	0.0172237
	2	0.0670744	0.102264	0.0526127		2	0.0241384	0.0370761	0.0306583		2	0.056291	0.0486917	0.0648716		2	0.00924633	0.014636	0.0232091
	3	0.111098	0.0462163	0.0598169		3	0.0243833	0.0436635	0.0313917		3	0.0507408	0.0592956	0.0758331		3	0.016013	0.0188921	0.0170034
	4	0.101691	0.101719	0.0203612		4	0.0372263	0.0684804	0.0377876		4	0.0796648	0.0538758	0.060873		4	0.0249289	0.0246391	0.0366962
	5	0.0735133	0.0600298	0.0147383		5	0.0495552	0.072308	0.0440798		5	0.149964	0.075677	0.064007		5	0.0395276	0.021685	0.0166054
	6	0.0874742	0.0531896	0.0241172		6	0.0527705	0.0777276	0.0481802		6	0.0702612	0.11628	0.0848864		6	0.0326874	0.0225496	0.0230659
